# Supplementary material for: Morphology-selective crystallization of cocatalysts on cuprous oxide with improved photocatalytic activity
Source: Royal Society of Chemistry journal article supplement (doi:10.1039/c4ce00525b), 2014-01-01
Supplement: c4ce00525b1.pdf [file c4ce00525b1.pdf]

## **Morphology-selective crystallization of cocatalysts on cuprous oxide with improved photocatalytic activity**

Xianmei Xiang<sup>a,c</sup>, Longzhu Zhang, Lingjun Chou and Xinheng Li<sup>\*a,b</sup>

<sup>a</sup> The State Key Laboratory for Oxo Synthesis and Selective Oxidation, Lanzhou  
Institute of Chemical Physics, Chinese Academy of Sciences, Lanzhou 730000,  
China. Fax: +86-512-62872747; Tel: +86-512-62872747

<sup>b</sup> Division of Advanced Nano-materials, Suzhou Institute of Nano-tech and Nano-  
bionics, Chinese Academy of Sciences, Suzhou 215123, China.

<sup>c</sup> Graduate University of Chinese Academy of Sciences, Beijing 100049, People's

Republic of China

Email: [xinhengli@licp.cas.cn](mailto:xinhengli@licp.cas.cn)

### **Synthesis of Cu<sub>2</sub>O cubes and octahedron**

All the chemical reagents were used as obtained. In a typical procedure of synthesizing cubic Cu<sub>2</sub>O, 10 mL of 2.0 M NaOH aqueous solution was added to 100 mL of 0.01 M CuCl<sub>2</sub> aqueous solution at 55 °C. After stirring for 0.5 h, 10 mL of 0.6 M ascorbic acid aqueous solution was added to the above solution. The mixed solution was kept at 55 °C with stirring for 5 h, and then gradually became brick-red, indicating formation of Cu<sub>2</sub>O. After that, the final products were collected by centrifugation, washing with distilled water and absolute ethanol several times and drying in a vacuum oven at 40 °C for 6 h. In a typical procedure of synthesizing octahedral Cu<sub>2</sub>O, 1.67 gram of polyvinylpyrrolidone was added to 50 mL of 0.01 M

CuCl<sub>2</sub> aqueous solution at 55 °C. After stirring for 10 min., 5 mL of 2.0 M NaOH aqueous solution was added to the above mixed solution. After stirring for 30 min., 5 mL of 0.6 M ascorbic acid aqueous solution was added. The mixed solution was kept at 55 °C with stirring for 5 hrs. The product was processed following the same procedure as the cubes.

### **Synthesis of MnO<sub>x</sub>-Cu<sub>2</sub>O heterostructures**

The MnO<sub>x</sub>-Cu<sub>2</sub>O heterostructures were obtained by an oxidation route under light irradiation. First, 20 mg Cu<sub>2</sub>O cubes were dispersed into 8 mL distilled water by sonication. And then the suspension was irradiated with a 300 W Xe lamp (PLS-SXE300) with a cutoff filter ( $\lambda < 420\text{nm}$ ). Under continuous stirring, 1.0 mL of 5.9 mM MnSO<sub>4</sub> aqueous solution and 1.0 mL of 15 mM NaIO<sub>3</sub> aqueous solution were simultaneously added to the above suspension, and the mixed solution reacted for 5 hrs. After that, the final products were collected by centrifugation, washing with distilled water and absolute ethanol several times and drying in a vacuum oven at 40 °C for 6 hrs.

### **Synthesis of NiO<sub>x</sub>-Cu<sub>2</sub>O heterostructures**

Synthesis of the NiO<sub>x</sub>-Cu<sub>2</sub>O heterostructures followed the same route as MnO<sub>x</sub>-Cu<sub>2</sub>O except nickel precursor. First, 20 mg Cu<sub>2</sub>O cubes were dispersed into 8 mL distilled water by sonication. Under continuous stirring, 1.0 mL of 1.3 mM NiCl<sub>2</sub> aqueous solution and 1.0 mL of 5 mM NaIO<sub>3</sub> aqueous solution were simultaneously added to the above suspension, and the mixed solution reacted for 5 hrs. After that,

the final products were collected by centrifugation, washing with distilled water and absolute ethanol several times and drying in a vacuum oven at 40 °C for 6 hrs.

### **Synthesis of Fe<sub>x</sub>O<sub>y</sub>-Cu<sub>2</sub>O heterostructures**

Synthesis of the Fe<sub>x</sub>O<sub>y</sub>-Cu<sub>2</sub>O heterostructures followed the same route as MnO<sub>x</sub>-Cu<sub>2</sub>O except iron precursor. As for 5% Fe<sub>x</sub>O<sub>y</sub>-Cu<sub>2</sub>O sample. First, 50 mg Cu<sub>2</sub>O cubes were dispersed into 14 mL distilled water by sonication. And then the suspension was irradiated with a 300 W Xe lamp (PLS-SXE300) with a cutoff filter ( $\lambda < 420\text{nm}$ ). Under continuous stirring, 1.0 mL of 18 mM FeSO<sub>4</sub> aqueous solution and 1.0 mL of 15 mM NaIO<sub>3</sub> aqueous solution were simultaneously added to the above suspension, and the mixed solution reacted for 5 hrs. After that, the final products were collected by centrifugation, washing with distilled water and absolute ethanol several times and drying in a vacuum oven at 40 °C for 6 hrs. In 1% Fe<sub>x</sub>O<sub>y</sub>-Cu<sub>2</sub>O sample preparation, 1.0 mL of 3.6 mM FeSO<sub>4</sub> aqueous solution was added while the other conditions were kept the same. Pristine iron oxide was synthesized by the same procedure except no Cu<sub>2</sub>O addition.

### **Characterizations**

The X-ray diffraction (XRD) patterns of the products were measured by using a BRUKER D8 Discover diffractometer with Cu-K <sub>$\alpha$</sub>  radiation ( $\lambda = 0.15406\text{ nm}$ ), and at a scanning rate of 0.02 deg/s in the  $2\theta$  range from 28° to 80°. Scanning electron microscopy (SEM) images were obtained using a Hitachi S4800 SEM.

### **Photocatalytic activity test**

Photocatalytic studies were carried out as follows: 15 mg of catalyst sample was dispersed into a 50 mL of  $2 \times 10^{-5}$  M methyl orange (MO) aqueous solution. The suspended solution was magnetically stirred in the dark for 0.5 h to reach its adsorption/desorption equilibrium, and then it was irradiated with magnetic stirring in a water bath kept at 25 °C under a 300 W Xe lamp (PLS-SXE300, 150 mw/cm<sup>2</sup>) equipped with UV filter (cutoff filter <420 nm) from a given distance of ca. 15 cm. At a given time interval, aliquot of the dispersion solution was taken for analysis on a spectrophotometer (PE Lambda 650s).

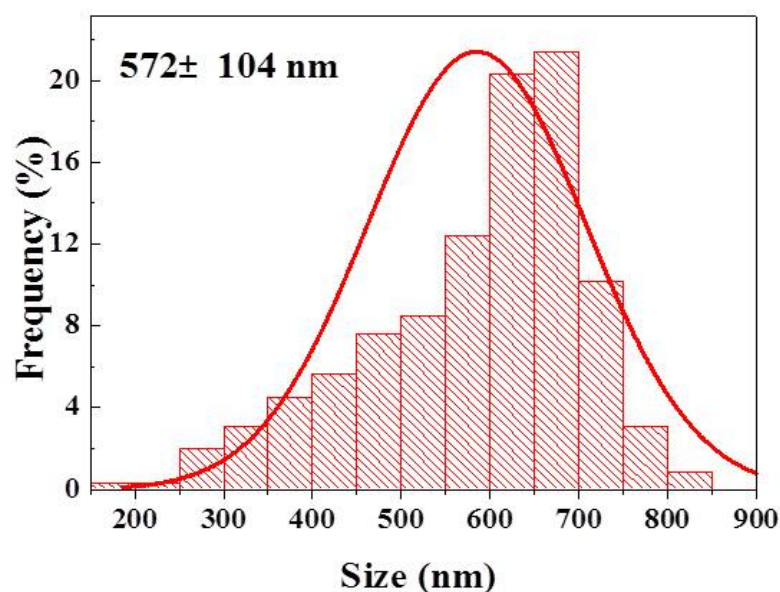

Fig. S1 Size distribution histogram of cubic Cu<sub>2</sub>O obtained in this work.

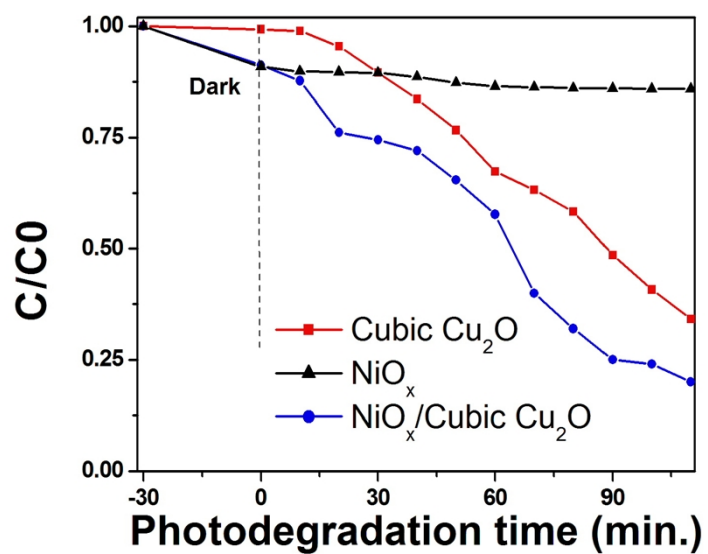

Fig. S2 Photodegradation of methyl orange by NiO<sub>x</sub>/Cu<sub>2</sub>O hybrid photocatalyst (blue line with round dots), pristine cubic Cu<sub>2</sub>O sample (red line with rhombi) and pristine NiO<sub>x</sub> sample (black line with triangles)

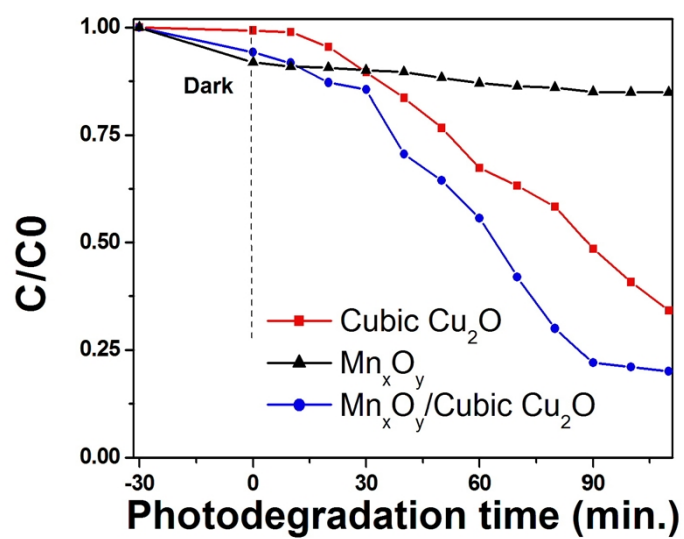

Fig. S3 Photodegradation of methyl orange by  $\text{Mn}_x\text{O}_y/\text{Cu}_2\text{O}$  hybrid photocatalyst (blue line with round dots), pristine cubic  $\text{Cu}_2\text{O}$  sample (red line with rhombi) and pristine  $\text{NiO}_x$  sample (black line with triangles)

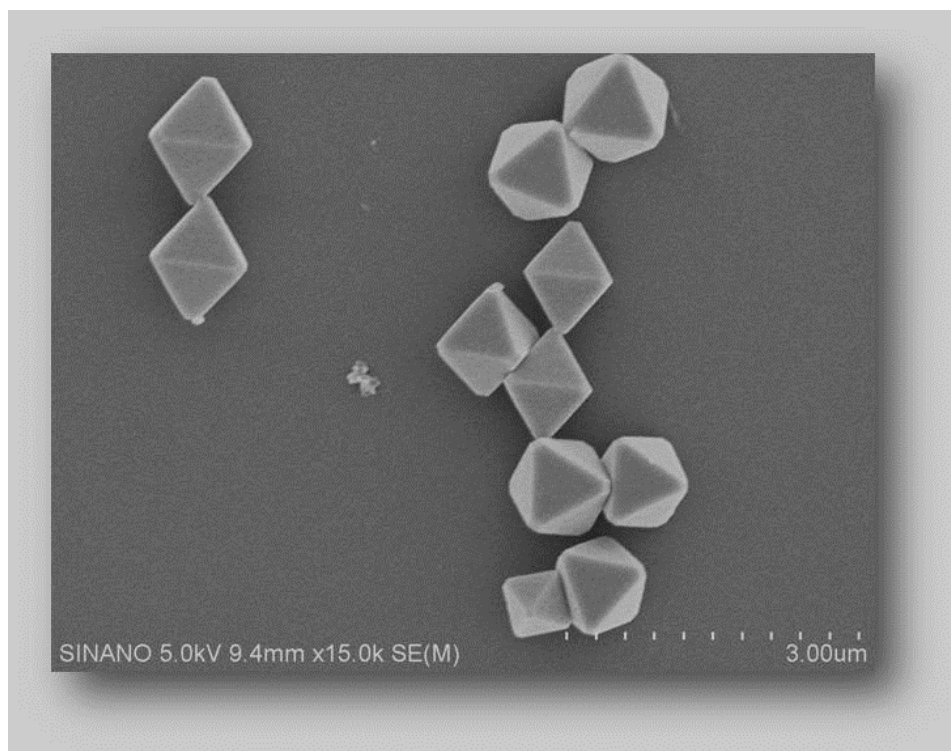

Fig. S4 SEM image of as-obtained truncated Cu<sub>2</sub>O octahedron.

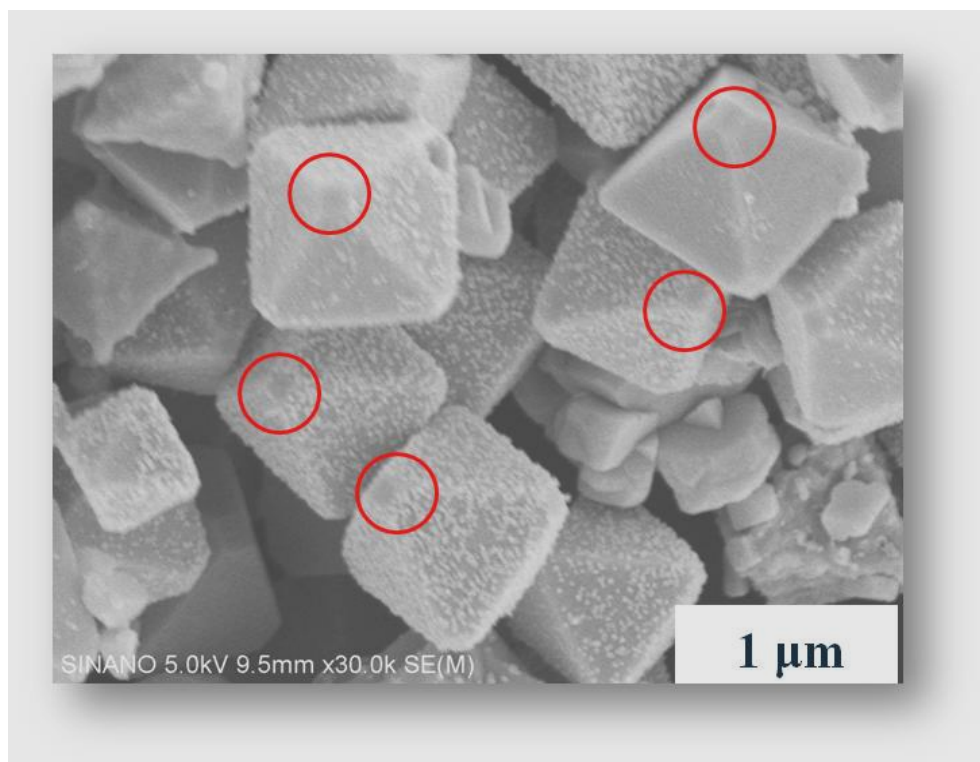

Fig. S5 SEM image of Au/octahedral  $\text{Cu}_2\text{O}$ , showing highly selective-deposition of gold on facet {111} other than facet {100}.
